# Supplementary material for: Dissociable contributions of mediodorsal and anterior thalamic nuclei in visual attentional performance: A comparison using nicotinic and muscarinic cholinergic receptor antagonists
Source: PubMed Central journal article supplement (PMC7708668; doi:10.1177/0269881120965880), 2020-10-24
Supplement: Suppl_Table_1.pdf [file Suppl_Table_1.pdf]

**Supplemental Table 1.** An overview of F statistics,  $p$  values and effect sizes (partial eta squared) from the main outcomes of the 2-way ANOVA performed for each Latin square. Where applicable, the method of transformation employed is shown.

|                              | <b>Baclofen &amp; Muscimol</b>                                                                                                            |                                                                                                                                          | <b>Scopolamine</b>                                                                                                                          |                                                                                                                                             | <b>Mecamylamine</b>                                                                                                            |                                                                                                                                |
|------------------------------|-------------------------------------------------------------------------------------------------------------------------------------------|------------------------------------------------------------------------------------------------------------------------------------------|---------------------------------------------------------------------------------------------------------------------------------------------|---------------------------------------------------------------------------------------------------------------------------------------------|--------------------------------------------------------------------------------------------------------------------------------|--------------------------------------------------------------------------------------------------------------------------------|
|                              | Treatment                                                                                                                                 | Treatment × Region                                                                                                                       | Treatment                                                                                                                                   | Treatment × Region                                                                                                                          | Treatment                                                                                                                      | Treatment × Region                                                                                                             |
| <b>Number of trials</b>      | $F_{(2, 26)}= 13.180$ ,<br><b>***<math>p &lt; 0.001</math></b> ,<br>$\eta^2= 0.503$ ,<br>$1-\beta= 0.994$ ;<br>square root transformation | $F_{(2, 26)}= 9.449$ ,<br><b>***<math>p &lt; 0.001</math></b> ,<br>$\eta^2= 0.421$ ,<br>$1-\beta= 0.965$ ;<br>square root transformation | $F_{(1.365, 16.385)}= 2.723$ ,<br><b><math>p = 0.109</math></b> ,<br>$\eta^2= 0.185$ ,<br>$1-\beta = 0.391$ ;<br>square root transformation | $F_{(1.365, 16.385)}= 0.267$ ,<br><b><math>p = 0.684</math></b> ,<br>$\eta^2= 0.022$ ,<br>$1-\beta = 0.081$ ;<br>square root transformation | -                                                                                                                              | -                                                                                                                              |
| <b>% Accuracy</b>            | $F_{(2, 26)}= 23.932$ ,<br><b>***<math>p &lt; 0.001</math></b> ,<br>$\eta^2= 0.648$ ,<br>$1-\beta= 1.000$                                 | $F_{(2, 26)}= 5.852$ ,<br><b>**<math>p = 0.008</math></b> ,<br>$\eta^2= 0.310$ ,<br>$1-\beta= 0.831$                                     | $F_{(2, 24)}= 1.895$ ,<br><b><math>p = 0.172</math></b> ,<br>$\eta^2= 0.136$ ,<br>$1-\beta= 0.354$                                          | $F_{(2, 24)}= 0.317$ ,<br><b><math>p = 0.731</math></b> ,<br>$\eta^2= 0.026$ ,<br>$1-\beta= 0.095$                                          | $F_{(3, 33)}= 0.780$ ,<br><b><math>p = 0.514</math></b> ,<br>$\eta^2= 0.066$ ,<br>$1-\beta= 0.199$                             | $F_{(3, 33)}= 1.309$ ,<br><b><math>p = 0.288</math></b> ,<br>$\eta^2= 0.106$ ,<br>$1-\beta= 0.316$                             |
| <b>% Omitted responses</b>   | $F_{(2, 26)}= 9.391$ ,<br><b>**<math>p = 0.003</math></b> ,<br>$\eta^2= 0.419$ ,<br>$1-\beta= 0.901$ ;<br>arcsine transformation          | $F_{(2, 26)}= 4.565$ ,<br><b>*<math>p = 0.035</math></b> ,<br>$\eta^2= 0.260$ ,<br>$1-\beta= 0.610$ ;<br>arcsine transformation          | $F_{(2, 24)}= 2.098$ ,<br><b><math>p = 0.145</math></b> ,<br>$\eta^2= 0.149$ ,<br>$1-\beta= 0.388$                                          | $F_{(2, 24)}= 2.446$ ,<br><b><math>p = 0.108</math></b> ,<br>$\eta^2= 0.169$ ,<br>$1-\beta= 0.444$                                          | $F_{(3, 33)}= 0.413$ ,<br><b><math>p = 0.745</math></b> ,<br>$\eta^2= 0.036$ ,<br>$1-\beta= 0.123$ ;<br>arcsine transformation | $F_{(3, 33)}= 0.840$ ,<br><b><math>p = 0.482</math></b> ,<br>$\eta^2= 0.071$ ,<br>$1-\beta= 0.212$ ;<br>arcsine transformation |
| <b>% Premature responses</b> | $F_{(2, 26)}= 4.418$ ,<br><b>*<math>p = 0.022</math></b> ,<br>$\eta^2= 0.254$ ,                                                           | $F_{(2, 26)}= 0.616$ ,<br><b><math>p = 0.548</math></b> ,<br>$\eta^2= 0.045$ ,                                                           | $F_{(2, 24)}= 1.097$ ,<br><b><math>p = 0.350</math></b> ,<br>$\eta^2= 0.084$ ,<br>$1-\beta= 0.220$                                          | $F_{(2, 24)}= 1.100$ ,<br><b><math>p = 0.349</math></b> ,<br>$\eta^2= 0.084$ ,                                                              | $F_{(3, 33)}= 3.361$ ,<br><b>*<math>p = 0.030</math></b> ,<br>$\eta^2= 0.234$ ,                                                | $F_{(3, 33)}= 1.158$ ,<br><b><math>p = 0.341</math></b> ,<br>$\eta^2= 0.095$ ,<br>$1-\beta= 0.282$ ;                           |

|                                   |                                                                                                                                |                                                                                                                              |                                                                                                                               |                                                                                                                             |                                                                                                                                  |                                                                                                                                  |
|-----------------------------------|--------------------------------------------------------------------------------------------------------------------------------|------------------------------------------------------------------------------------------------------------------------------|-------------------------------------------------------------------------------------------------------------------------------|-----------------------------------------------------------------------------------------------------------------------------|----------------------------------------------------------------------------------------------------------------------------------|----------------------------------------------------------------------------------------------------------------------------------|
|                                   | 1-β= 0.709;<br>arcsine trans-<br>formation                                                                                     | 1-β= 0.142;<br>arcsine trans-<br>formation                                                                                   |                                                                                                                               | 1-β= 0.220                                                                                                                  | 1-β= 0.709;<br>arcsine transfor-<br>mation                                                                                       | arcsine transfor-<br>mation                                                                                                      |
| <b>Perseverative responses</b>    | $F_{(2, 26)}= 10.913$ ,<br><b>***<math>p &lt; 0.001</math></b> ,<br>$\eta^2= 0.456$ ,<br>1-β= 0.982                            | $F_{(2, 26)}= 5.273$ ,<br><b>*<math>p = 0.012</math></b> ,<br>$\eta^2= 0.289$ ,<br>1-β= 0.789                                | $F_{(2, 24)}= 1.058$ ,<br><b><math>p = 0.363</math></b> ,<br>$\eta^2= 0.081$ ,<br>1-β= 0.213                                  | $F_{(2, 24)}= 0.684$ ,<br><b><math>p = 0.514</math></b> ,<br>$\eta^2= 0.054$ ,<br>1-β= 0.152                                | $F_{(3, 33)}= 0.813$ ,<br><b><math>p = 0.496</math></b> ,<br>$\eta^2= 0.069$ ,<br>1-β= 0.206;<br>arcsine transfor-<br>mation     | $F_{(3, 33)}= 1.518$ ,<br><b><math>p = 0.228</math></b> ,<br>$\eta^2= 0.121$ ,<br>1-β= 0.363;<br>arcsine transfor-<br>mation     |
| <b>Reward collection latency</b>  | $F_{(2, 26)}= 2.038$<br><b><math>p = 0.151</math></b> ,<br>$\eta^2= 0.136$ ,<br>1-β= 0.381;<br>logarithmic transfor-<br>mation | $F_{(2, 26)}= 0.723$ ,<br><b><math>p = 0.495</math></b> ,<br>$\eta^2= 0.053$ ,<br>1-β= 0.159;<br>logarithmic transformation  | $F_{(2, 24)}= 0.836$ ,<br><b><math>p = 0.446</math></b> ,<br>$\eta^2= 0.065$ ,<br>1-β= 0.176;<br>logarithmic transformation   | $F_{(2, 24)}= 2.276$ ,<br><b><math>p = 0.124</math></b> ,<br>$\eta^2= 0.159$ ,<br>1-β= 0.417;<br>logarithmic transformation | $F_{(3, 33)}= 1.996$ ,<br><b><math>p = 0.134</math></b> ,<br>$\eta^2= 0.154$ ,<br>1-β= 0.466;<br>logarithmic transformation      | $F_{(3, 33)}= 0.694$ ,<br><b><math>p = 0.562</math></b> ,<br>$\eta^2= 0.059$ ,<br>1-β= 0.181;<br>logarithmic transformation      |
| <b>Correct response latency</b>   | $F_{(2, 26)}= 3.981$ , <b>*<math>p = 0.031</math></b> , $\eta^2= 0.234$ ,<br>1-β= 0.661;<br>logarithmic transfor-<br>mation    | $F_{(2, 26)}= 2.886$ ,<br><b><math>p = 0.074</math></b> ,<br>$\eta^2= 0.182$ ,<br>1-β= 0.515;<br>logarithmic transformation  | $F_{(2, 24)}= 7.755$ ,<br><b>**<math>p = 0.003</math></b> ,<br>$\eta^2= 0.393$ ,<br>1-β= 0.921;<br>logarithmic transformation | $F_{(2, 24)}= 0.987$ ,<br><b><math>p = 0.387</math></b> ,<br>$\eta^2= 0.076$ ,<br>1-β= 0.201;<br>logarithmic transformation | $F_{(3, 33)}= 0.502$ ,<br><b><math>p = 0.683</math></b> ,<br>$\eta^2= 0.044$ ,<br>1-β= 0.141;<br>logarithmic transformation      | $F_{(3, 33)}= 0.399$ ,<br><b><math>p = 0.755</math></b> ,<br>$\eta^2= 0.035$ ,<br>1-β= 0.120;<br>logarithmic trans-<br>formation |
| <b>Incorrect response latency</b> | $F_{(2, 26)}= 2.038$ , <b><math>p = 0.151</math></b> ,<br>$\eta^2= 0.136$ ,<br>1-β= 0.381;<br>logarithmic transfor-<br>mation  | $F_{(2, 26)}= 4.321$ ,<br><b>*<math>p = 0.024</math></b> ,<br>$\eta^2= 0.249$ ,<br>1-β= 0.699;<br>logarithmic transformation | $F_{(2, 24)}= 1.885$ ,<br><b><math>p = 0.174</math></b> ,<br>$\eta^2= 0.136$ ,<br>1-β= 0.353                                  | $F_{(2, 24)}= 1.855$ ,<br><b><math>p = 0.178</math></b> ,<br>$\eta^2= 0.134$ ,<br>1-β= 0.348                                | $F_{(3, 33)}= 0.535$ ,<br><b><math>p = 0.662</math></b> ,<br>$\eta^2= 0.046$ ,<br>1-β= 0.147;<br>logarithmic trans-<br>formation | $F_{(3, 33)}= 0.298$ ,<br><b><math>p = 0.827</math></b> ,<br>$\eta^2= 0.026$ ,<br>1-β= 0.101;<br>logarithmic trans-<br>formation |
